# Supplementary material for: Use of a cross-linked polystyrene/titanium tetrachloride tightly bound coordination complex as catalyst for the production of petroleum resins
Source: Royal Society of Chemistry journal article supplement (doi:10.1039/d2re00429a), 2023-01-01
Supplement: d2re00429a1.pdf [file d2re00429a1.pdf]

Supplementary information

Use of a cross-linked polystyrene/titanium tetrachloride tightly bound coordination complex as catalyst for the production of petroleum resins

Ali Rahmatpour<sup>1\*</sup>, Parvaneh Soleimani<sup>1</sup>, Soroush Karamian<sup>2</sup>, Razieh Dadvand<sup>2</sup>

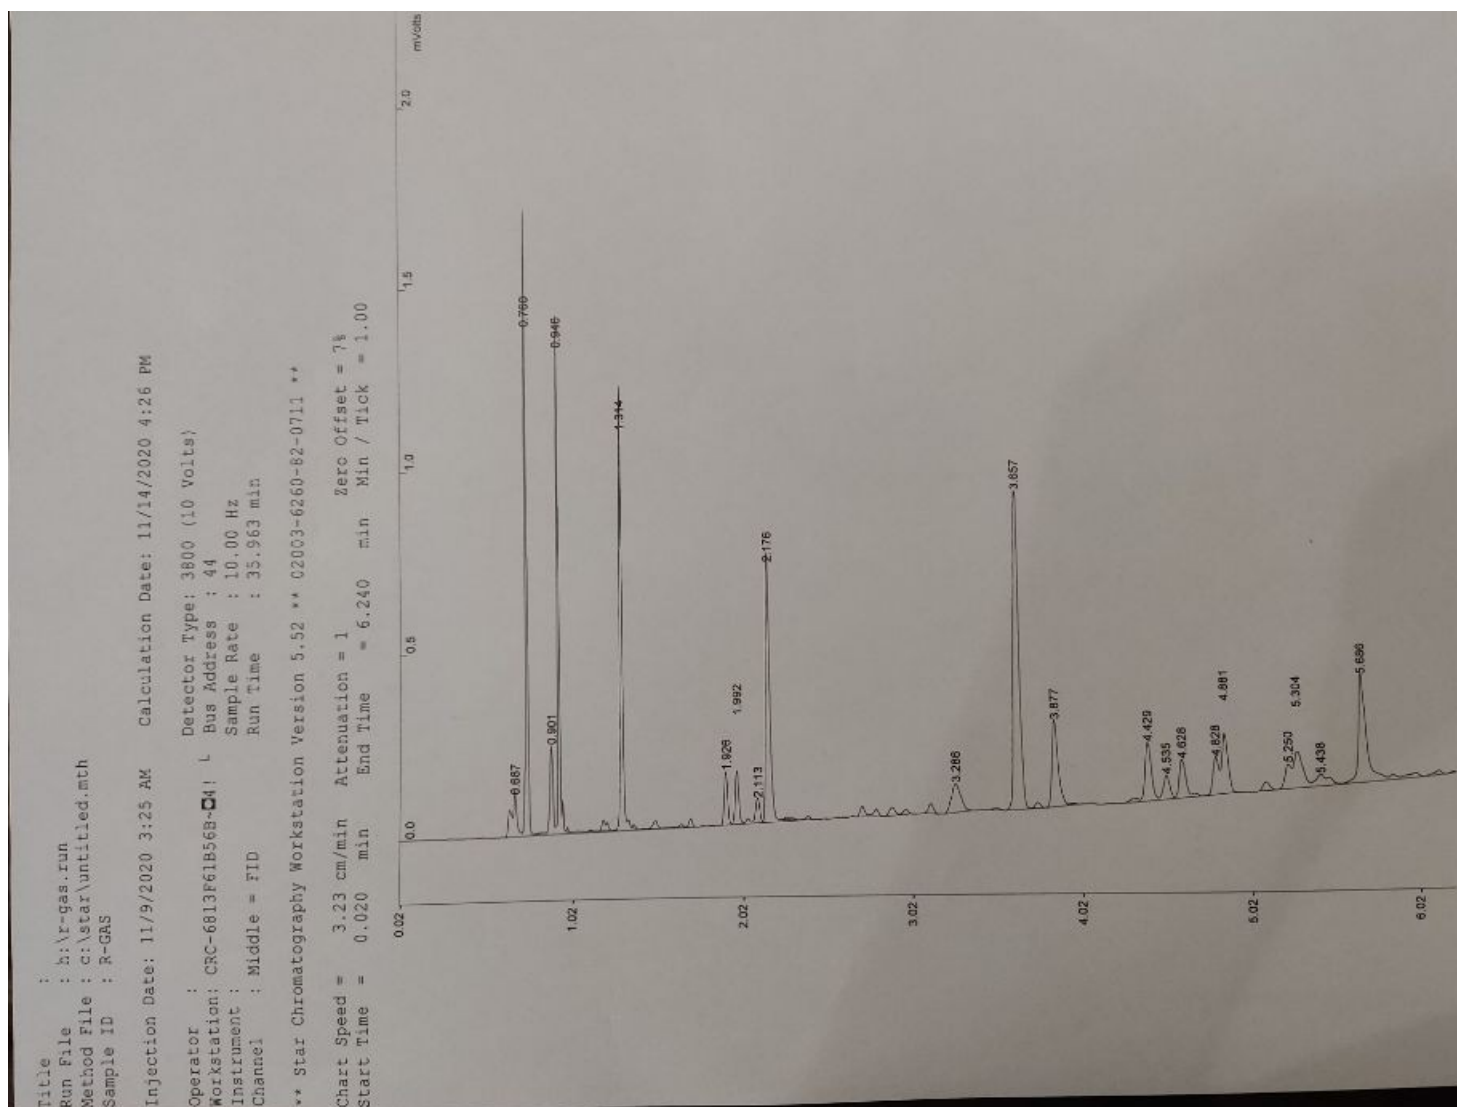

Fig. 1S Gas chromatogram of raw pygas feedstock

Title :  
 Run File : R:\r-gas-run  
 Method File : c:\atlas\untitled1.mth  
 Sample ID : B-GAS

Injection Date: 11/9/2020 3:25 PM Calculation Date: 11/14/2020 4:26 PM

Operator :  
 Workstation: CBC-0613P618968-04/ \*  
 Instrument :  
 Channel : Middle - FID  
 Detector Type: 3800 (10 Volts)  
 Bus Address : 44  
 Sample Rate : 10.00 Hz  
 Run Time : 35.953 min

\*\* Star Chromatography Workstation Version 5.32 \*\* 02003-0250-02-0711 \*\*

Run Mode : Analytic  
 Peak Measurement: Peak Area  
 Calculation Type: Percent

| Peak No. | Peak Name | Result (%) | Ret. Time (min) | Time Offset (min) | Area (counts) | Sep. Code | Width 1/2 (sec) | Status Codes |
|----------|-----------|------------|-----------------|-------------------|---------------|-----------|-----------------|--------------|
| 1        |           | 1.5021     | 0.487           | 0.000             | 174           | VV        | 1.2             |              |
| 2        |           | 10.3249    | 0.760           | 0.000             | 1287          | VV        | 0.6             |              |
| 3        |           | 2.7085     | 0.901           | 0.000             | 317           | VV        | 1.2             |              |
| 4        |           | 6.5269     | 0.946           | 0.000             | 465           | VV        | 0.6             |              |
| 5        |           | 10.6221    | 1.314           | 0.000             | 1242          | VV        | 0.9             |              |
| 6        |           | 1.7318     | 1.926           | 0.000             | 302           | PV        | 1.4             |              |
| 7        |           | 1.8443     | 1.992           | 0.000             | 314           | VV        | 1.6             |              |
| 8        |           | 0.8474     | 2.113           | 0.000             | 311           | VV        | 2.0             |              |
| 9        |           | 10.4982    | 2.178           | 0.000             | 1244          | VV        | 1.0             |              |
| 10       |           | 2.5343     | 3.286           | 0.000             | 294           | BB        | 3.8             |              |
| 11       |           | 17.2369    | 3.857           | 0.000             | 2025          | PP        | 2.1             |              |
| 12       |           | 5.1104     | 3.877           | 0.000             | 597           | PB        | 2.2             |              |
| 13       |           | 3.4857     | 4.429           | 0.000             | 407           | VV        | 2.4             |              |
| 14       |           | 1.4464     | 4.535           | 0.000             | 169           | VV        | 2.6             |              |
| 15       |           | 2.2900     | 4.628           | 0.000             | 266           | VV        | 2.6             |              |
| 16       |           | 2.0511     | 4.828           | 0.000             | 240           | PV        | 2.8             |              |
| 17       |           | 3.4787     | 4.881           | 0.000             | 407           | VV        | 2.8             |              |
| 18       |           | 1.3967     | 5.250           | 0.000             | 143           | VV        | 2.9             |              |
| 19       |           | 3.1552     | 5.304           | 0.000             | 369           | VV        | 4.8             |              |
| 20       |           | 0.8835     | 5.432           | 0.000             | 113           | VV        | 5.0             |              |
| 21       |           | 8.0048     | 5.685           | 0.000             | 936           | VV        | 2.7             |              |
| Totals:  |           | 100.0001   |                 | 0.000             | 11590         |           |                 |              |

Total Unidentified Counts : 11488 counts

Detected Peaks: 22 Rejected Peaks: 31 Identified Peaks: 0

Multiplier: 1 Divisor: 1 Unidentified Peak Factor: 0

Baseline Offset: 0 microVolts

Noise (used): 3 microVolts - monitored before this run

Manual injection

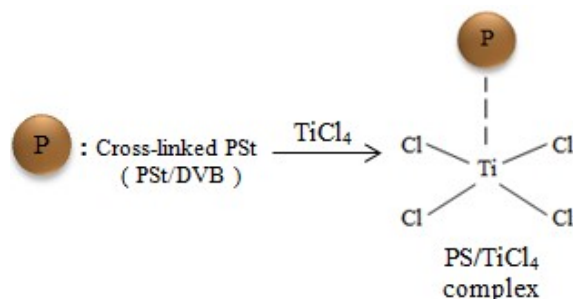

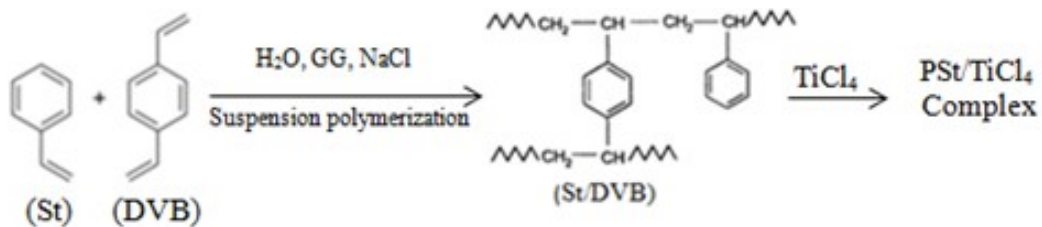

**Scheme S1** Synthetic route of polymeric catalyst

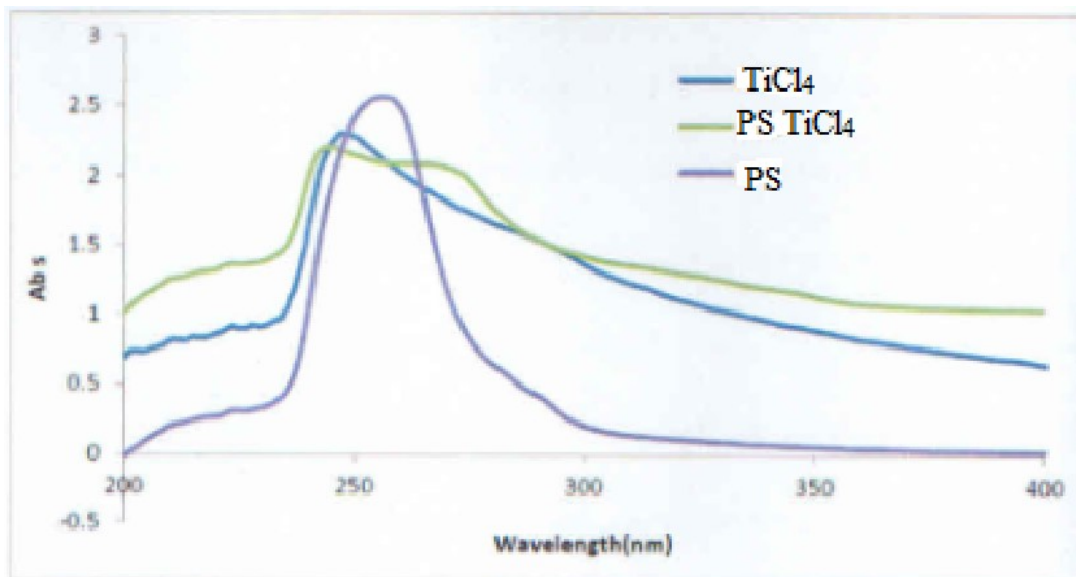

**Figure S2** UV spectra of PS, PS/TiCl<sub>4</sub> in CS<sub>2</sub>

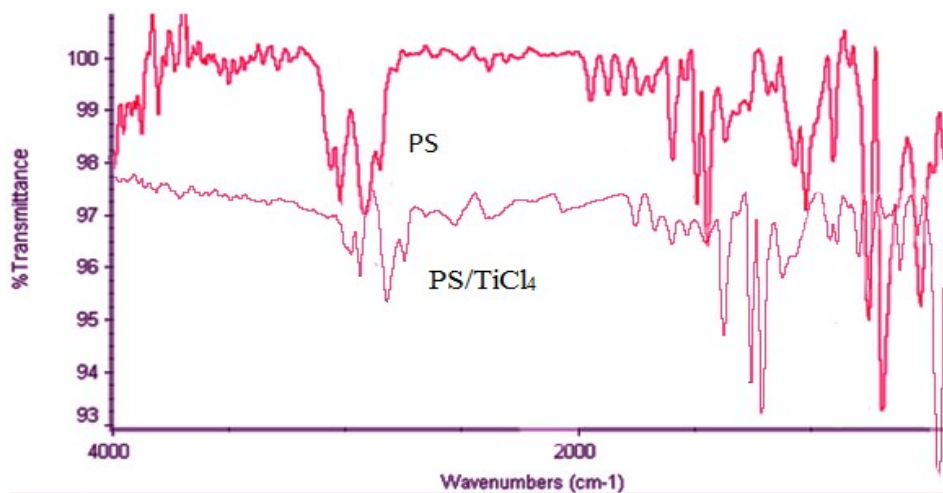

**Figure S3** FT-IR spectra of PS carrier and PS-TiCl<sub>4</sub> complex samples

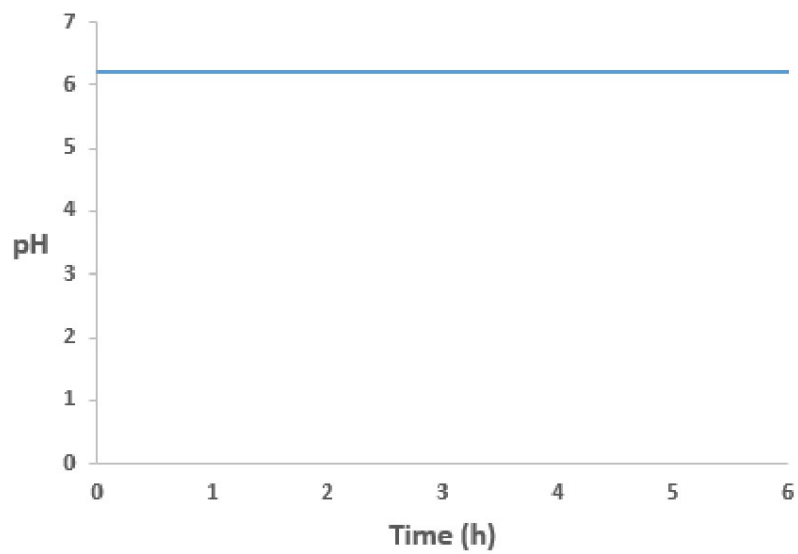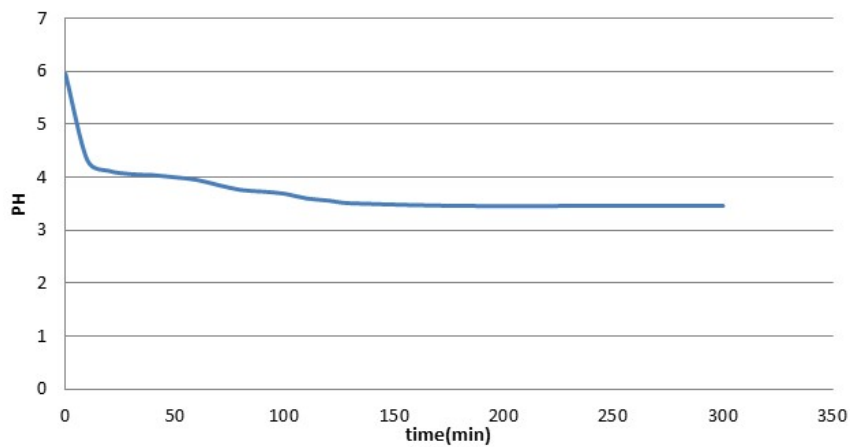

**Figure S4** The time-dependence of the pH of acetone-water solution (60%) containing (up) pristine PS, (down) polymeric catalyst (PS/TiCl<sub>4</sub>)

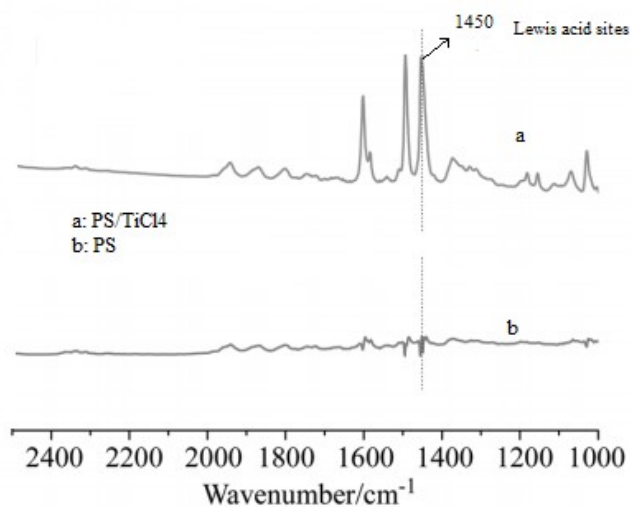

**Figure S5** Pyridine-adsorbed FT-IR spectra of PS and PS/TiCl<sub>4</sub> samples

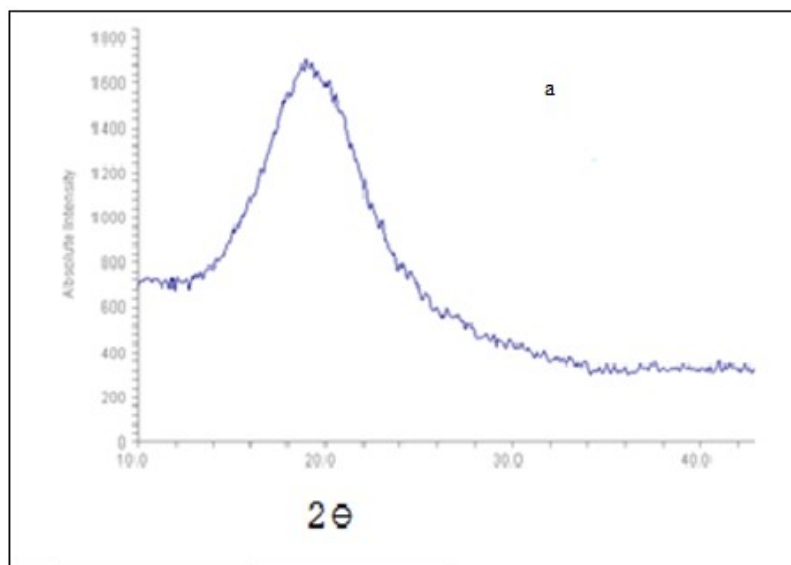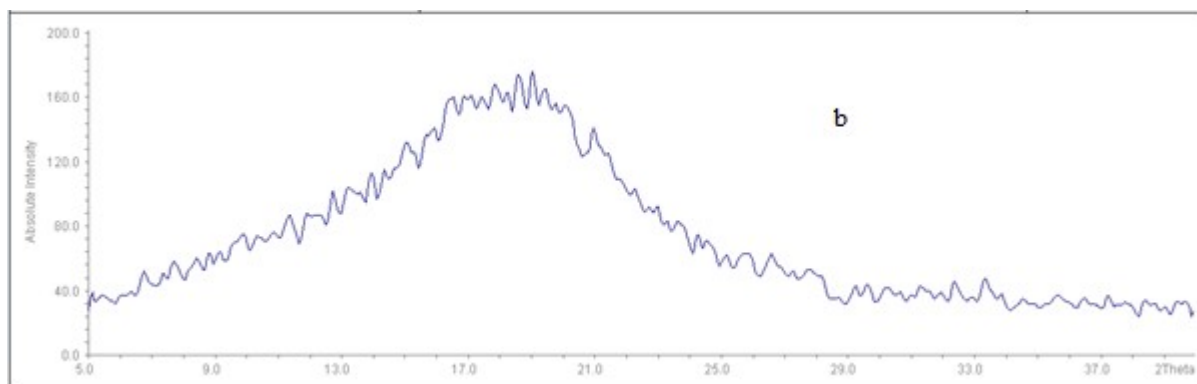

**Fig. S6** XRD patterns of (a) PS/DVB; (b) PS/TiCl<sub>4</sub> complex samples

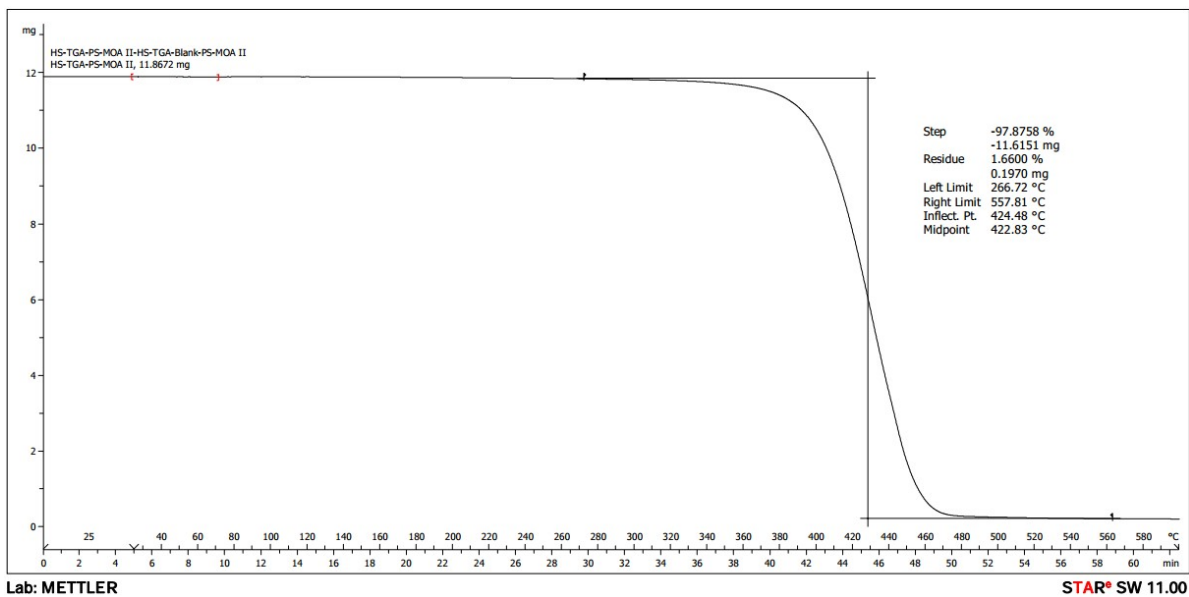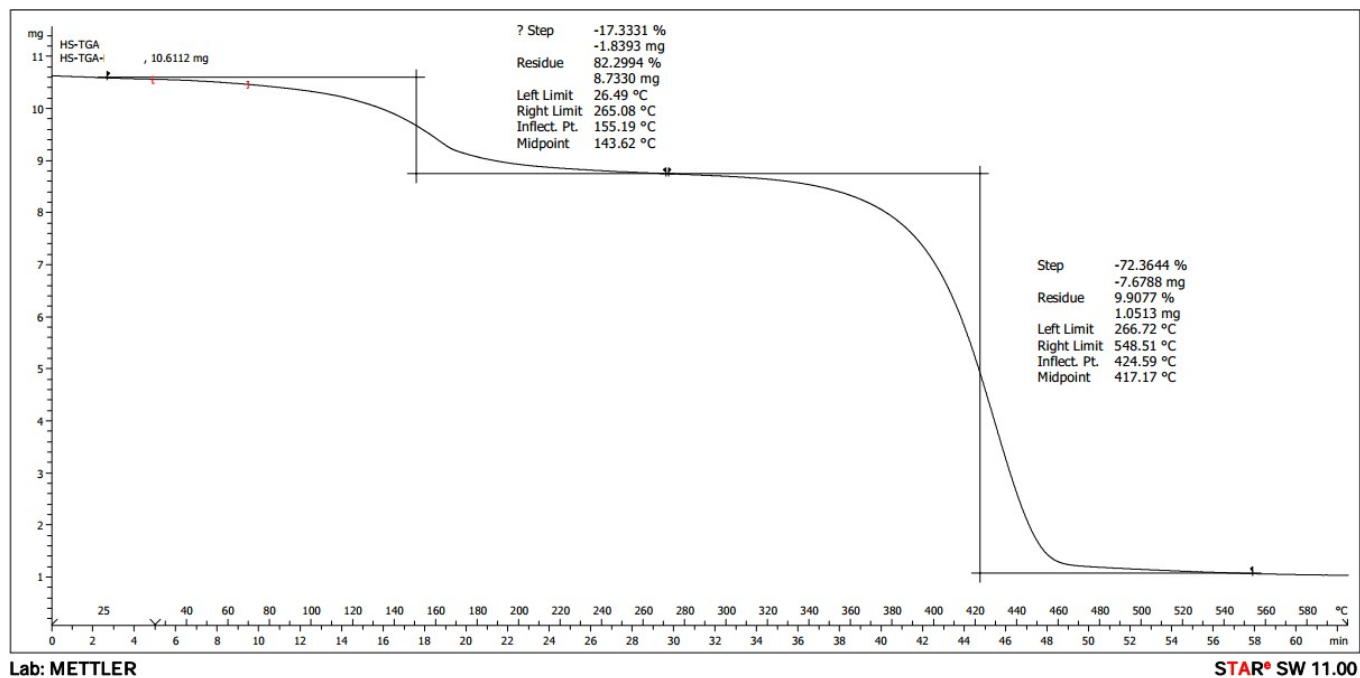

Figure S7 TGA thermograph of DVB-crosslinked PS (up) and PS/TiCl<sub>4</sub> complex catalyst (down)

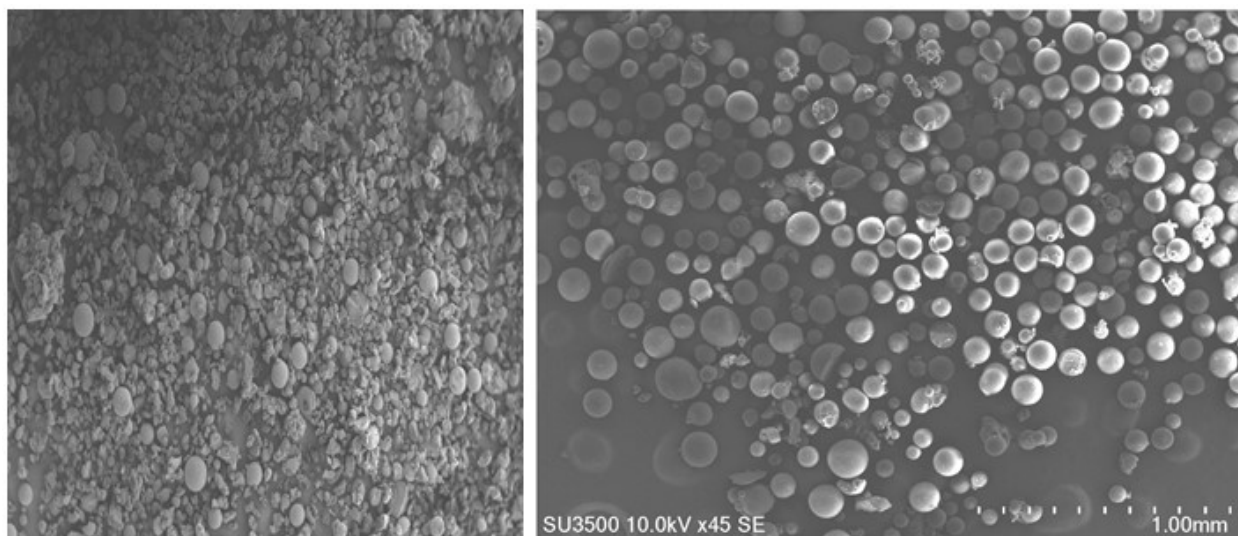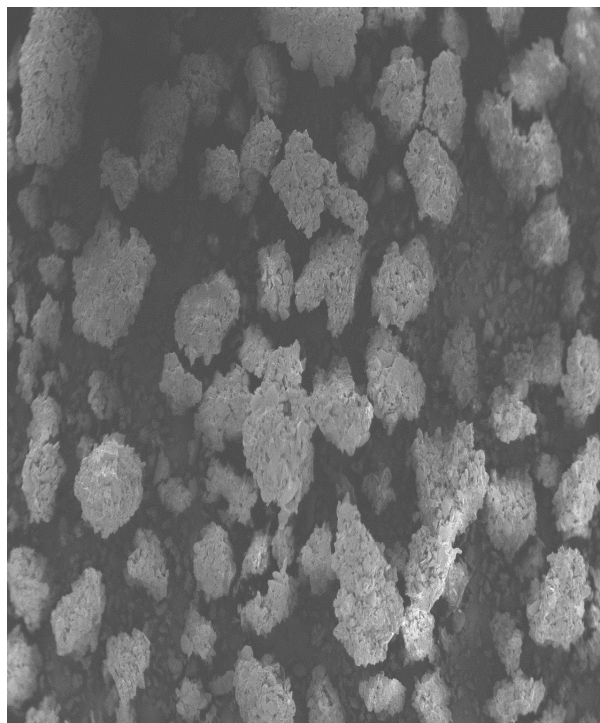

**Figure S8.** SEM images of (up) PS carrier, (down) PS/TiCl<sub>4</sub> samples

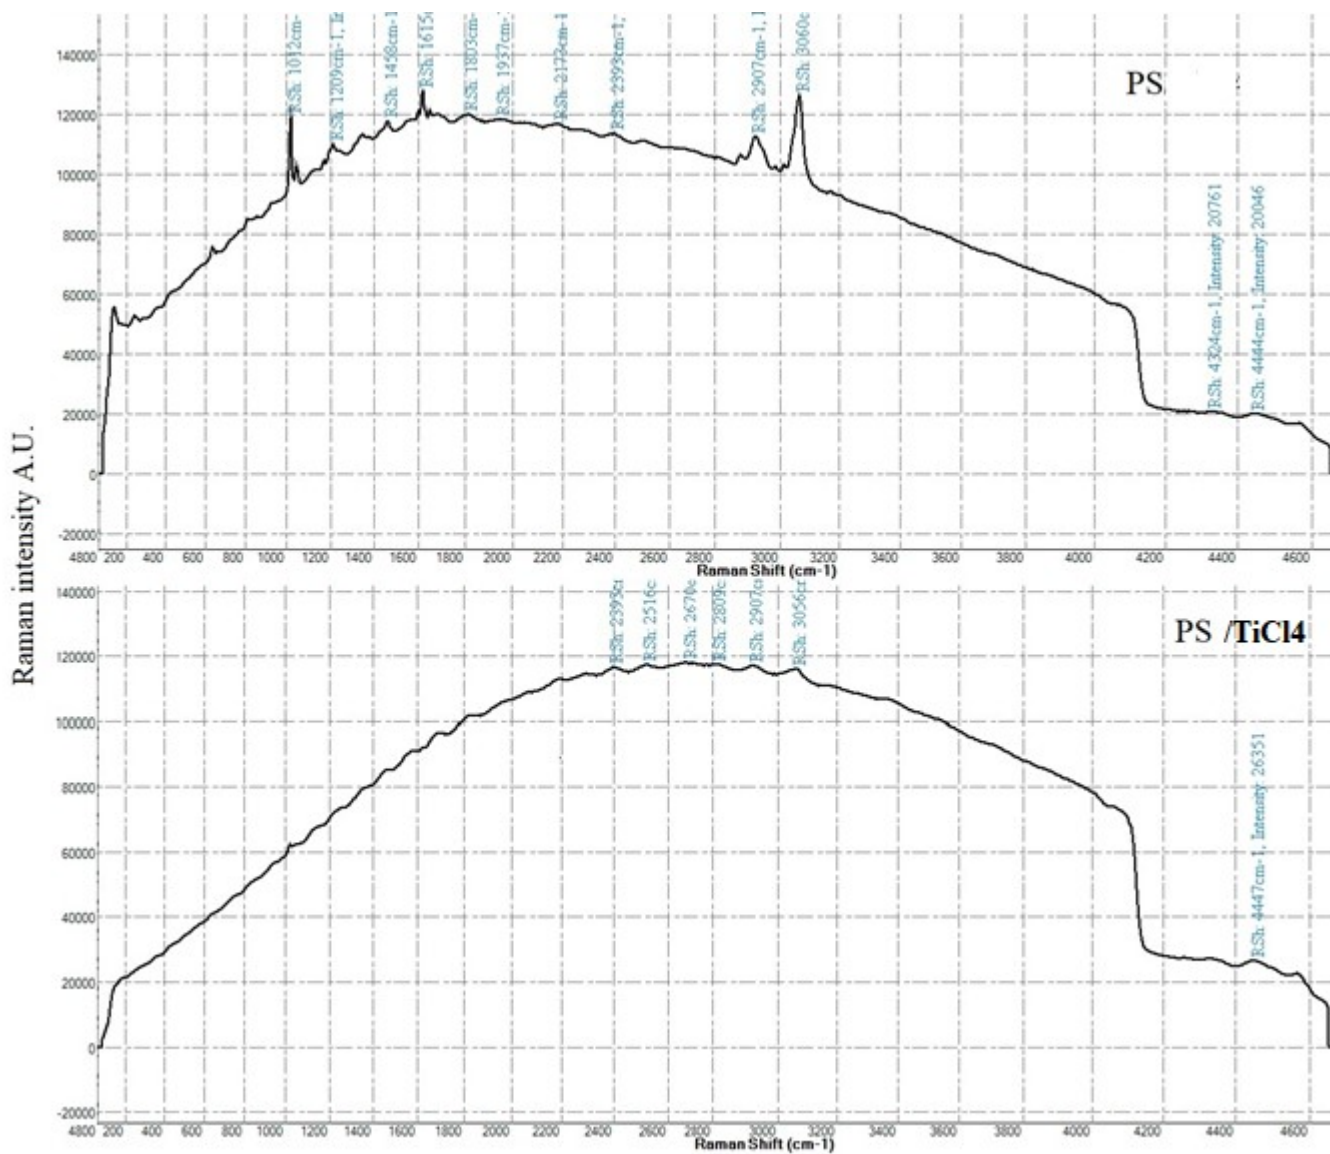

Fig. S9 Raman spectra of PS and PS/TiCl<sub>4</sub> samples



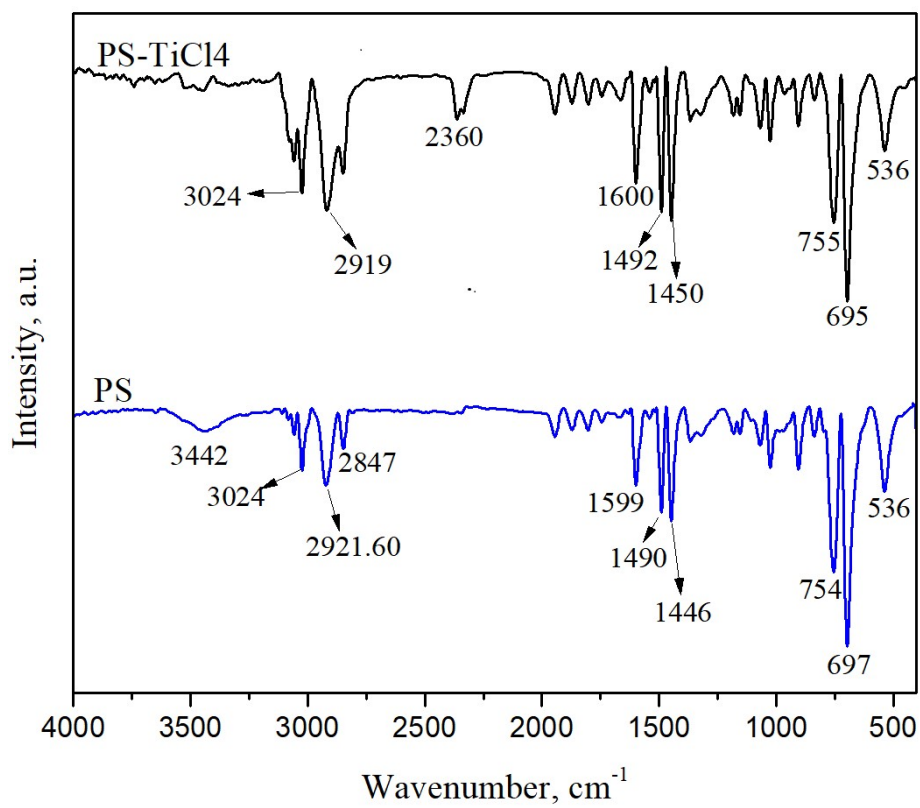

**Fig. S10** FT IR spectra of re-prepared PS and PS/TiCl<sub>4</sub> samples

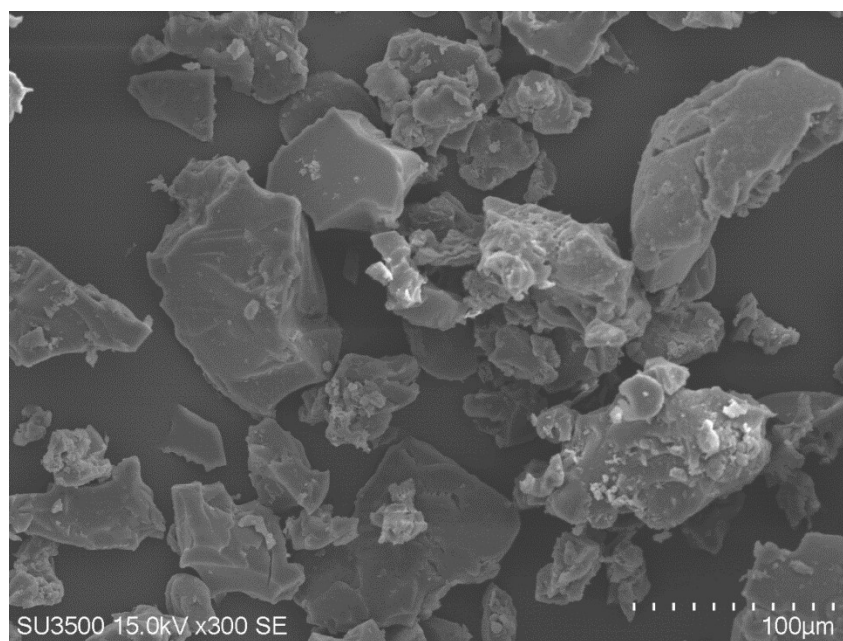

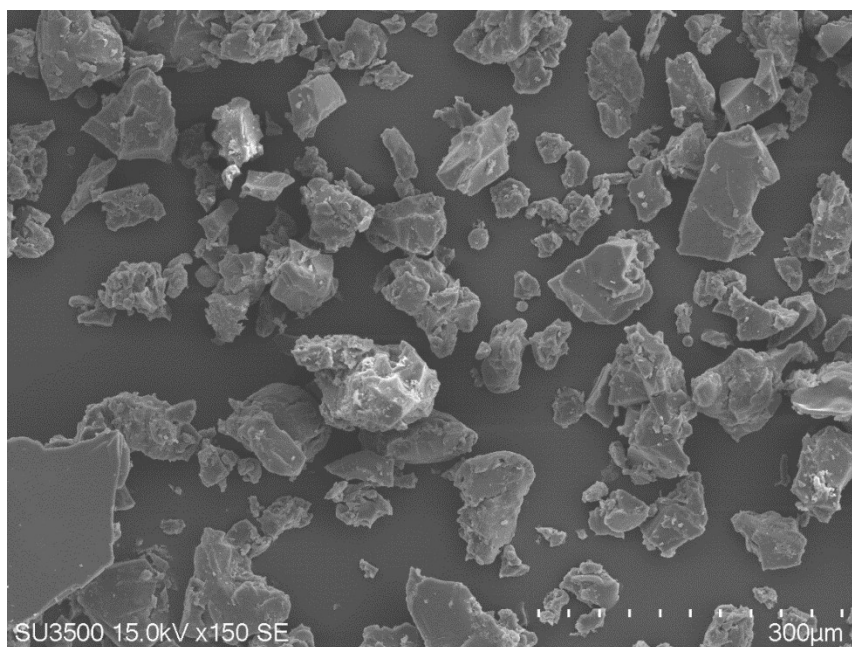

**Fig. 11S** SEM images of PS/TiCl<sub>4</sub> catalyst used after four polymerizations at different magnifications

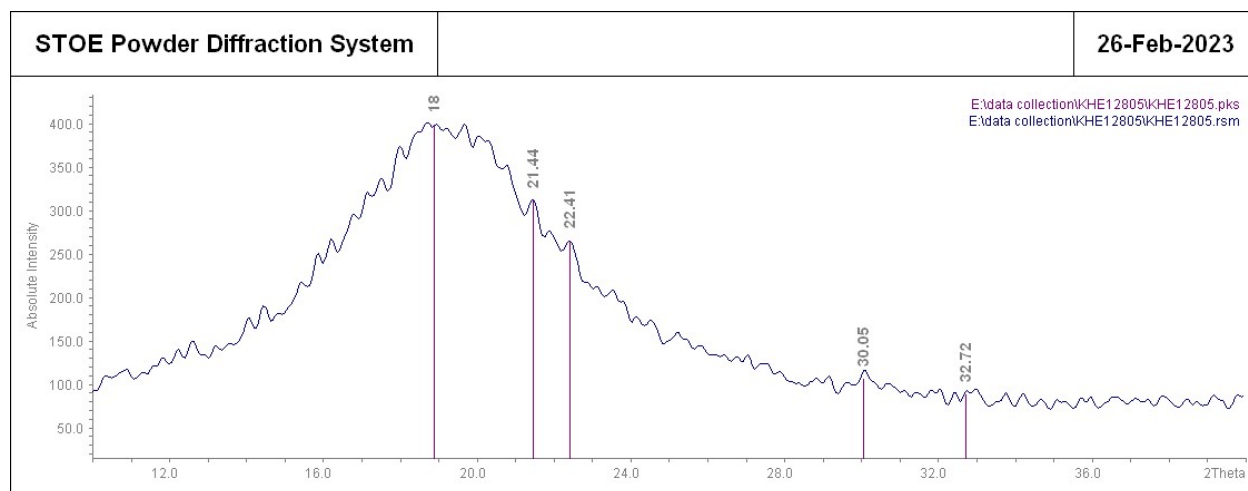

**Fig. 12S** XRD diffraction pattern of PS/TiCl<sub>4</sub> recovered after four polymerizations

**Table 1S** Swelling properties of the crosslinked-PS with different degrees of cross-linking<sup>b</sup> in toluene

| Degree of crosslinking (%) | 4               | 6  | 8  | 10 |
|----------------------------|-----------------|----|----|----|
| EWC (%)                    | 86 <sup>a</sup> | 78 | 74 | 62 |

<sup>a</sup> Less mechanical strength in successive polymerizations

<sup>b</sup> Crosslinking agent up to 8% was used to ensure a balance between rigidity and swelling properties.

“Analysis of raw pygas in different time intervals”

| Accredit                                                                 | Analysis         | Result | Unit Measurement | Specification | Analysis Method |
|--------------------------------------------------------------------------|------------------|--------|------------------|---------------|-----------------|
| Unit Category: OLEFIN                                                    |                  |        |                  |               |                 |
| Unit Tag: 650                                                            |                  |        |                  |               |                 |
| SCNo: S-651[Raw Gasoline (PyGas) bottom Debutanizer 10-T-651 to Storage] |                  |        |                  |               |                 |
| Sampling Time: 15/04/22 1394/02/02 08:04                                 |                  |        |                  |               |                 |
| Sample ID: 348113                                                        |                  |        |                  |               |                 |
| Unchecked                                                                | R.V.P            | 53.8   | KPa              |               | ASTM D6378      |
| Unchecked                                                                | Density at 15.6C | 0.8440 | gr/cm3           |               | ASTM D4052      |
| Unchecked                                                                | Total Sulfur     | 144    | mg/Kg            |               | ASTM D5453      |
| Unchecked                                                                | Water Content    | 360    | ppm              |               | ASTM E203       |
| Sampling Time: 15/04/25 1394/02/05 08:04                                 |                  |        |                  |               |                 |
| Sample ID: 348542                                                        |                  |        |                  |               |                 |
| Unchecked                                                                | IBP              | 36.1   | °C               |               | ASTM D86        |
| Unchecked                                                                | 10%Recovery      | 58.8   | C                |               | ASTM D86        |
| Unchecked                                                                | 90%Recovery      | 186.5  | C                |               | ASTM D86        |
| Unchecked                                                                | 60%Recovery      | 97.5   | C                |               | ASTM D86        |
| Unchecked                                                                | R.V.P            | 51.7   | KPa              |               | ASTM D6378      |
| Unchecked                                                                | FBP              | 213.4  | C                |               | ASTM D86        |
| Unchecked                                                                | 5%Recovery       | 53.8   | C                |               | ASTM D86        |
| Unchecked                                                                | 80%Recovery      | 162.7  | C                |               | ASTM D86        |
| Unchecked                                                                | 95%Recovery      | 206.5  | C                |               | ASTM D86        |
| Unchecked                                                                | 20%Recovery      | 66.4   | C                |               | ASTM D86        |
| Unchecked                                                                | 30%Recovery      | 73.6   | C                |               | ASTM D86        |
| Unchecked                                                                | 40%Recovery      | 81.0   | C                |               | ASTM D86        |
| Unchecked                                                                | 50%Recovery      | 88.4   | C                |               | ASTM D86        |
| Unchecked                                                                | 70%Recovery      | 117.3  | C                |               | ASTM D86        |
| Unchecked                                                                | Density at 15.6C | 0.8457 | gr/cm3           |               | ASTM D4052      |
| Unchecked                                                                | Water Content    | 400    | ppm              |               | ASTM E203       |
| Unchecked                                                                | Total Sulfur     | 108    | mg/Kg            |               | ASTM D5453      |
| Sampling Time: 15/04/29 1394/02/09 08:04                                 |                  |        |                  |               |                 |
| Sample ID: 349154                                                        |                  |        |                  |               |                 |
| Unchecked                                                                | Density at 15.6C | 0.8394 | gr/cm3           |               | ASTM D4052      |
| Unchecked                                                                | Water Content    | 460    | ppm              |               | ASTM E203       |
| Unchecked                                                                | Total Sulfur     | 120    | mg/Kg            |               | ASTM D5453      |

|                                          |                  |        |        |  |            |
|------------------------------------------|------------------|--------|--------|--|------------|
| Unchecked                                | R.V.P            | 58.3   | KPa    |  | ASTM D6378 |
| Sampling Time: 15/05/06 1394/02/16 08:05 |                  |        |        |  |            |
| Sample ID: 349869                        |                  |        |        |  |            |
| Unchecked                                | Density at 15.6C | 0.8274 | gr/cm3 |  | ASTM D4052 |
| Unchecked                                | Water Content    | 550    | ppm    |  | ASTM E203  |
| Unchecked                                | Total Sulfur     | 99     | mg/Kg  |  | ASTM D5453 |
| Unchecked                                | R.V.P            | 54.1   | KPa    |  | ASTM D6378 |
| Sampling Time: 15/05/09 1394/02/19 08:05 |                  |        |        |  |            |
| Sample ID: 350369                        |                  |        |        |  |            |
| Unchecked                                | FBP              | 181.5  | C      |  | ASTM D86   |
| Unchecked                                | IBP              | 36.2   | C      |  | ASTM D86   |
| Unchecked                                | 5%Recovery       | 49.4   | C      |  | ASTM D86   |
| Unchecked                                | 10%Recovery      | 53.5   | C      |  | ASTM D86   |
| Unchecked                                | 80%Recovery      | 107.3  | C      |  | ASTM D86   |
| Unchecked                                | 90%Recovery      | 162.6  | C      |  | ASTM D86   |
| Unchecked                                | 95%Recovery      | 181.3  | C      |  | ASTM D86   |
| Unchecked                                | 20%Recovery      | 59     | C      |  | ASTM D86   |
| Unchecked                                | 30%Recovery      | 64.5   | C      |  | ASTM D86   |
| Unchecked                                | 40%Recovery      | 70.9   | C      |  | ASTM D86   |
| Unchecked                                | 50%Recovery      | 77.7   | C      |  | ASTM D86   |
| Unchecked                                | 60%Recovery      | 84.2   | C      |  | ASTM D86   |
| Unchecked                                | 70%Recovery      | 91.2   | C      |  | ASTM D86   |
| Unchecked                                | Density at 15.6C | 0.8153 | gr/cm3 |  | ASTM D4052 |
| Unchecked                                | Total Sulfur     | 66.2   | mg/Kg  |  | ASTM D5453 |
| Unchecked                                | R.V.P            | 61     | KPa    |  | ASTM D6378 |
| Unchecked                                | Water Content    | 560    | ppm    |  | ASTM E203  |
| Sampling Time: 15/05/13 1394/02/23 08:05 |                  |        |        |  |            |
| Sample ID: 351053                        |                  |        |        |  |            |
| Unchecked                                | Density at 15.6C | 0.8368 | gr/cm3 |  | ASTM D4052 |
| Unchecked                                | Water Content    | 440    | ppm    |  | ASTM E203  |
| Unchecked                                | Total Sulfur     | 120.8  | mg/Kg  |  | ASTM D5453 |
| Unchecked                                | R.V.P            | 57.4   | KPa    |  | ASTM D6378 |
| Sampling Time: 15/05/16 1394/02/26 08:05 |                  |        |        |  |            |
| Sample ID: 351518                        |                  |        |        |  |            |
| Unchecked                                | FBP              | 219.9  | C      |  | ASTM D86   |
| Unchecked                                | IBP              | 37.2   | C      |  | ASTM D86   |
| Unchecked                                | 5%Recovery       | 53     | C      |  | ASTM D86   |

|           |             |      |   |  |          |
|-----------|-------------|------|---|--|----------|
| Unchecked | 10%Recovery | 57.8 | C |  | ASTM D86 |
|-----------|-------------|------|---|--|----------|

|           |                  |        |        |  |            |
|-----------|------------------|--------|--------|--|------------|
| Unchecked | 80%Recovery      | 163.1  | C      |  | ASTM D86   |
| Unchecked | 90%Recovery      | 187.2  | C      |  | ASTM D86   |
| Unchecked | 95%Recovery      | 211.8  | C      |  | ASTM D86   |
| Unchecked | 20%Recovery      | 65.2   | C      |  | ASTM D86   |
| Unchecked | 30%Recovery      | 72.9   | C      |  | ASTM D86   |
| Unchecked | 40%Recovery      | 80.9   | C      |  | ASTM D86   |
| Unchecked | 50%Recovery      | 88.7   | C      |  | ASTM D86   |
| Unchecked | 60%Recovery      | 98.2   | C      |  | ASTM D86   |
| Unchecked | 70%Recovery      | 118.7  | C      |  | ASTM D86   |
| Unchecked | Density at 15.6C | 0.8439 | gr/cm3 |  | ASTM D4052 |
| Unchecked | Water Content    | 330    | ppm    |  | ASTM E203  |
| Unchecked | Total Sulfur     | 101.5  | mg/Kg  |  | ASTM D5453 |
| Unchecked | R.V.P            | 52.1   | KPa    |  | ASTM D6378 |

Sampling Time: 15/05/20 1394/02/30 08:05

Sample ID: 352140

|           |                  |        |        |  |            |
|-----------|------------------|--------|--------|--|------------|
| Unchecked | Density at 15.6C | 0.8408 | gr/cm3 |  | ASTM D4052 |
| Unchecked | Water Content    | 350    | ppm    |  | ASTM E203  |
| Unchecked | Total Sulfur     | 73     | mg/Kg  |  | ASTM D5453 |
| Unchecked | R.V.P            | 53.0   | KPa    |  | ASTM D6378 |

Sampling Time: 15/05/23 1394/03/02 08:05

Sample ID: 352570

|           |                  |        |        |  |            |
|-----------|------------------|--------|--------|--|------------|
| Unchecked | FBP              | 186.9  | C      |  | ASTM D86   |
| Unchecked | IBP              | 35.1   | C      |  | ASTM D86   |
| Unchecked | 5%Recovery       | 50.1   | C      |  | ASTM D86   |
| Unchecked | 10%Recovery      | 54.2   | C      |  | ASTM D86   |
| Unchecked | 80%Recovery      | 101.1  | C      |  | ASTM D86   |
| Unchecked | 90%Recovery      | 155.9  | C      |  | ASTM D86   |
| Unchecked | 95%Recovery      | 178.3  | C      |  | ASTM D86   |
| Unchecked | 20%Recovery      | 60.2   | C      |  | ASTM D86   |
| Unchecked | 30%Recovery      | 66.2   | C      |  | ASTM D86   |
| Unchecked | 40%Recovery      | 72.1   | C      |  | ASTM D86   |
| Unchecked | 50%Recovery      | 78     | C      |  | ASTM D86   |
| Unchecked | 60%Recovery      | 83.2   | C      |  | ASTM D86   |
| Unchecked | 70%Recovery      | 89     | C      |  | ASTM D86   |
| Unchecked | Density at 15.6C | 0.8222 | gr/cm3 |  | ASTM D4052 |
| Unchecked | Water Content    | 310    | ppm    |  | ASTM E203  |
| Unchecked | Total Sulfur     | 64     | mg/Kg  |  | ASTM D5453 |
| Unchecked | R.V.P            | 61.4   | KPa    |  | ASTM D6378 |

|                                          |                  |        |        |  |            |
|------------------------------------------|------------------|--------|--------|--|------------|
| Sampling Time: 15/05/27 1394/03/06 08:05 |                  |        |        |  |            |
| Sample ID: 353209                        |                  |        |        |  |            |
| Unchecked                                | Density at 15.6C | 0.8401 | gr/cm3 |  | ASTM D4052 |
| Unchecked                                | Water Content    | 520    | ppm    |  | ASTM E203  |
| Unchecked                                | R.V.P            | 53.1   | KPa    |  | ASTM D6378 |
| Sampling Time: 15/05/30 1394/03/09 08:05 |                  |        |        |  |            |
| Sample ID: 353770                        |                  |        |        |  |            |
| Unchecked                                | 10%Recovery      | 58.4   | C      |  | ASTM D86   |
| Unchecked                                | 60%Recovery      | 97.3   | C      |  | ASTM D86   |
| Unchecked                                | FBP              | 217.7  | C      |  | ASTM D86   |
| Unchecked                                | IBP              | 38.1   | C      |  | ASTM D86   |
| Unchecked                                | 5%Recovery       | 53.8   | C      |  | ASTM D86   |
| Unchecked                                | 80%Recovery      | 161.8  | C      |  | ASTM D86   |
| Unchecked                                | 90%Recovery      | 186    | C      |  | ASTM D86   |
| Unchecked                                | 95%Recovery      | 206.8  | C      |  | ASTM D86   |
| Unchecked                                | 20%Recovery      | 65.3   | C      |  | ASTM D86   |
| Unchecked                                | 30%Recovery      | 72.6   | C      |  | ASTM D86   |
| Unchecked                                | 40%Recovery      | 80.3   | C      |  | ASTM D86   |
| Unchecked                                | 50%Recovery      | 88.1   | C      |  | ASTM D86   |
| Unchecked                                | 70%Recovery      | 116.2  | C      |  | ASTM D86   |
| Unchecked                                | Density at 15.6C | 0.8428 | gr/cm3 |  | ASTM D4052 |
| Unchecked                                | Water Content    | 460    | ppm    |  | ASTM E203  |
| Unchecked                                | Total Sulfur     | 58.5   | mg/Kg  |  | ASTM D5453 |
| Unchecked                                | R.V.P            | 50.2   | KPa    |  | ASTM D6378 |
| Sampling Time: 15/06/03 1394/03/13 08:06 |                  |        |        |  |            |
| Sample ID: 354409                        |                  |        |        |  |            |
| Unchecked                                | Density at 15.6C | 0.8442 | gr/cm3 |  | ASTM D4052 |
| Unchecked                                | Water Content    | 330    | ppm    |  | ASTM E203  |
| Unchecked                                | Total Sulfur     | 96     | mg/Kg  |  | ASTM D5453 |
| Unchecked                                | R.V.P            | 50.4   | KPa    |  | ASTM D6378 |
| Sampling Time: 15/06/06 1394/03/16 08:06 |                  |        |        |  |            |
| Sample ID: 354891                        |                  |        |        |  |            |
| Unchecked                                | FBP              | 216.6  | C      |  | ASTM D86   |
| Unchecked                                | IBP              | 37.3   | C      |  | ASTM D86   |
| Unchecked                                | 5%Recovery       | 53.5   | C      |  | ASTM D86   |
| Unchecked                                | 10%Recovery      | 58.4   | C      |  | ASTM D86   |
| Unchecked                                | 80%Recovery      | 166.5  | C      |  | ASTM D86   |
| Unchecked                                | 90%Recovery      | 187.9  | C      |  | ASTM D86   |

|           |                  |        |        |  |            |
|-----------|------------------|--------|--------|--|------------|
| Unchecked | 95%Recovery      | 208.3  | C      |  | ASTM D86   |
| Unchecked | 20%Recovery      | 65.8   | C      |  | ASTM D86   |
| Unchecked | 30%Recovery      | 73.7   | C      |  | ASTM D86   |
| Unchecked | 40%Recovery      | 81.8   | C      |  | ASTM D86   |
| Unchecked | 50%Recovery      | 89.9   | C      |  | ASTM D86   |
| Unchecked | 60%Recovery      | 100.3  | C      |  | ASTM D86   |
| Unchecked | 70%Recovery      | 123.4  | C      |  | ASTM D86   |
| Unchecked | Density at 15.6C | 0.8441 | gr/cm3 |  | ASTM D4052 |
| Unchecked | Water Content    | 370    | ppm    |  | ASTM E203  |
| Unchecked | Total Sulfur     | 94     | mg/Kg  |  | ASTM D5453 |
| Unchecked | R.V.P            | 50.4   | KPa    |  | ASTM D6378 |

Sampling Time: 15/06/10 1394/03/20 08:06

Sample ID: 355714

|           |                  |        |        |  |            |
|-----------|------------------|--------|--------|--|------------|
| Unchecked | Density at 15.6C | 0.8416 | gr/cm3 |  | ASTM D4052 |
| Unchecked | Water Content    | 480    | ppm    |  | ASTM E203  |
| Unchecked | Total Sulfur     | 158    | mg/Kg  |  | ASTM D5453 |
| Unchecked | R.V.P            | 51.8   | KPa    |  | ASTM D6378 |

Sampling Time: 15/06/13 1394/03/23 08:06

Sample ID: 356258

|           |                  |        |        |  |            |
|-----------|------------------|--------|--------|--|------------|
| Unchecked | FBP              | 214.3  | C      |  | ASTM D86   |
| Unchecked | IBP              | 36.5   | C      |  | ASTM D86   |
| Unchecked | 5%Recovery       | 49.3   | C      |  | ASTM D86   |
| Unchecked | 10%Recovery      | 54.0   | C      |  | ASTM D86   |
| Unchecked | 80%Recovery      | 165.7  | C      |  | ASTM D86   |
| Unchecked | 90%Recovery      | 189.7  | C      |  | ASTM D86   |
| Unchecked | 95%Recovery      | 210.3  | C      |  | ASTM D86   |
| Unchecked | 20%Recovery      | 61.6   | C      |  | ASTM D86   |
| Unchecked | 30%Recovery      | 69.5   | C      |  | ASTM D86   |
| Unchecked | 40%Recovery      | 78.5   | C      |  | ASTM D86   |
| Unchecked | 50%Recovery      | 87.2   | C      |  | ASTM D86   |
| Unchecked | 60%Recovery      | 97.0   | C      |  | ASTM D86   |
| Unchecked | 70%Recovery      | 118.1  | C      |  | ASTM D86   |
| Unchecked | Density at 15.6C | 0.8339 | gr/cm3 |  | ASTM D4052 |
| Unchecked | Water Content    | 850    | ppm    |  | ASTM E203  |
| Unchecked | Total Sulfur     | 84     | mg/Kg  |  | ASTM D5453 |
| Unchecked | R.V.P            | 57.1   | KPa    |  | ASTM D6378 |
| Unchecked | Recovery         | 97.0   | %      |  | ASTM D86   |
| Unchecked | Residue          | 1.1    | %      |  | ASTM D86   |



|           |      |     |   |  |          |
|-----------|------|-----|---|--|----------|
| Unchecked | Loss | 1.9 | % |  | ASTM D86 |
|-----------|------|-----|---|--|----------|
